## Retraction: JQ1 suppresses tumor growth via PTEN/PI3K/AKT pathway in endometrial cancer

Haifeng Qiu<sup>1,2</sup>, Jing Li<sup>3</sup>, Leslie H. Clark<sup>2</sup>, Amanda L. Jackson<sup>2</sup>, Lu Zhang<sup>2,4</sup>, Hui Guo<sup>2,4</sup>, Joshua E. Kilgore<sup>2</sup>, Paola A. Gehrig<sup>2</sup>, Chunxiao Zhou<sup>2,5</sup> and Victoria L. Bae-Jump<sup>2,5</sup>

<sup>1</sup>Department of Obstetrics and Gynecology, the First Affiliated Hospital of Zhengzhou University, Zhengzhou, China

<sup>2</sup>Division of Gynecological Oncology, University of North Carolina at Chapel Hill, Chapel Hill, NC, USA

<sup>3</sup>Department of Oncology, the First Affiliated Hospital of Zhengzhou University, Zhengzhou, China

<sup>4</sup>Department of Gynecologic Oncology, Shandong Cancer Hospital and Institute, Jinan, China

<sup>5</sup>Lineberger Cancer Center, University of North Carolina at Chapel Hill, Chapel Hill, NC, USA

**Published:** April 24, 2026

**Copyright:** © 2026 Qiu et al. This is an open access article distributed under the terms of the [Creative Commons Attribution License](#) (CC BY 4.0), which permits unrestricted use, distribution, and reproduction in any medium, provided the original author and source are credited.

**This article has been retracted:** The University of North Carolina at Chapel Hill conducted a research misconduct proceeding that involved this article and concluded that research misconduct occurred, specifically the falsification with reuse of western blot bands from different experimental conditions in Figures 1E and 3D; and falsification with reuse of immunostained images from different experimental conditions in Figures 2C and 5G. Therefore, the results and conclusions of this publication are no longer reliable. The authors requested the article retraction. Consequently, the Editorial decision has been made to retract this article. All authors agree with this decision, with the exception of Dr. Haifeng Qiu and Dr. Jing Li, who did not respond.

Original article: Oncotarget. 2016; 7:66809–66821. <https://doi.org/10.18632/oncotarget.11631>
